# Supplementary material for: Adhesion Failures Determine the Pattern of Choroidal Neovascularization in the Eye: A Computer Simulation Study
Source: PubMed Central journal article supplement (PMC3342931; doi:10.1371/journal.pcbi.1002440), 2012-05-03
Supplement: pcbi.1002440.s001.pdf [file pcbi.1002440.s001.pdf]

| ID | <i>RRl</i> | <i>RRp</i> | <i>RBl</i> | <i>RBp</i> | <i>ROl</i> | $P_{\text{init}}$ |
|----|------------|------------|------------|------------|------------|-------------------|
| 1  | 3          | 3          | 3          | 3          | 3          | 0.00              |
| 4  | 3          | 2          | 3          | 3          | 3          | 0.20              |
| 2  | 3          | 3          | 3          | 2          | 3          | 0.30              |
| 3  | 3          | 3          | 3          | 1          | 3          | 0.30              |
| 7  | 3          | 1          | 3          | 3          | 3          | 0.30              |

Table S1. **Adhesion Scenarios with Infrequent or No CNV Initiation.** Adhesion scenarios that result in CNV initiation with probability less than or equal to 0.3 ( $P_{\text{init}} \leq 0.3$ ). CNV does not initiate when adhesion is normal. Moderate to severe impairment of either **RPE-RPE** or **RPE-BrM plastic coupling** alone, without impairment of the corresponding **labile adhesion** barely increases the probabilities of CNV initiation. Key: ID: adhesion scenario ID. *RRl*: **RPE-RPE labile adhesion** strength, *RRp*: **RPE-RPE plastic coupling** strength, *RBl*: **RPE-BrM labile adhesion** strength, *RBp*: **RPE-BrM plastic coupling** strength, *ROl*: **RPE-POS labile adhesion** strength.  $P_{\text{init}}$ : CNV initiation probability calculated from 10 simulation replicas for each adhesion scenario. Scaled adhesion strengths: 3: normal (green), 2: moderately impaired (yellow), 1: severely impaired (weak) (red).
