# Supplementary material for: Adhesion Failures Determine the Pattern of Choroidal Neovascularization in the Eye: A Computer Simulation Study
Source: PubMed Central journal article supplement (PMC3342931; doi:10.1371/journal.pcbi.1002440), 2012-05-03
Supplement: pcbi.1002440.s004.pdf [file pcbi.1002440.s004.pdf]

| ID | <i>RRl</i> | <i>RRp</i> | <i>RBl</i> | <i>RBp</i> | <i>ROl</i> | $P_{\text{init}}$ | $\langle MW \rangle$ |
|----|------------|------------|------------|------------|------------|-------------------|----------------------|
| 47 | 1          | 3          | 2          | 2          | 3          | 1.00              | 0.39                 |
| 48 | 1          | 3          | 2          | 1          | 3          | 1.00              | 0.49                 |
| 82 | 1          | 3          | 1          | 3          | 3          | 1.00              | 0.44                 |
| 51 | 1          | 2          | 2          | 1          | 3          | 1.00              | 0.43                 |
| 85 | 1          | 2          | 1          | 3          | 3          | 1.00              | 0.44                 |
| 54 | 1          | 1          | 2          | 1          | 3          | 1.00              | 0.40                 |
| 88 | 1          | 1          | 1          | 3          | 3          | 1.00              | 0.45                 |

Table S4. **Adhesion Scenarios Prone to Early Type 3 CNV ( $0.35 < MW < 0.65$ ) if CNV initiates.**  $0.35 < MW < 0.65$  indicates that **stalk cells** come into contact with both **BrM** and the **POS**. Most adhesion scenarios have severely impaired **RPE-RPE labile adhesion**, normal **RPE-POS labile adhesion** and either severely or moderately impaired **RPE-BrM labile adhesion** ( $RBl \leq 2$ ). **RPE-RPE** and **RPE-BrM plastic coupling** have little effect on the mean  $MW$  and **CNV** initiation probability. For example, adhesion scenarios ID: 82 ( $RRp = 3$ ), 85 ( $RRp = 2$ ) and 88 ( $RRp = 1$ ) have similar mean  $MW$  and **CNV** initiation probability regardless of the **RPE-RPE plastic coupling** strength ( $RRp$ ). The **CNV** initiation probability ranges from 0.7 to 1. Key: ID: adhesion scenario ID. *RRl*: **RPE-RPE labile adhesion** strength, *RRp*: **RPE-RPE plastic coupling** strength, *RBl*: **RPE-BrM labile adhesion** strength, *RBp*: **RPE-BrM plastic coupling** strength, *ROl*: **RPE-POS labile adhesion** strength.  $P_{\text{init}}$ : **CNV** initiation probability.  $\langle MW \rangle$ : mean morphometric weight. Both  $\langle MW \rangle$  and  $P_{\text{init}}$  are calculated from 10 simulation replicas for each adhesion scenario. Scaled adhesion strengths: 3: normal (green), 2: moderately impaired (yellow), 1: severely impaired (weak) (red). Adhesion scenarios sequentially sorted largest to smallest in order by *RRl*, then by *RRp*, then by *RBl*, then by *RBp* and then by *ROl*.
