# Supplementary material for: گزارش یک مورد سیالادنیت اسکلروزه مزمن درغدد بزاقی فرعی
Source: PLOS journal article supplement (doi:10.1371/journal.pcbi.1002440), 2012-08-10
Supplement: S2 (10.1371/journal.pcbi.1002440.s002) [file journal.pcbi.1002440.s002]

| ID | <i>RRl</i> | <i>RRp</i> | <i>RBl</i> | <i>RBp</i> | <i>ROl</i> | $P_{init}$ | $\langle MW \rangle$ |
|----|------------|------------|------------|------------|------------|------------|----------------------|
| 3  | 3          | 3          | 3          | 1          | 3          | 0.30       | 1.00                 |
| 38 | 3          | 3          | 2          | 2          | 3          | 0.90       | 1.00                 |
| 39 | 3          | 3          | 2          | 1          | 3          | 1.00       | 1.00                 |
| 73 | 3          | 3          | 1          | 3          | 3          | 1.00       | 1.00                 |
| 74 | 3          | 3          | 1          | 2          | 3          | 1.00       | 1.00                 |
| 75 | 3          | 3          | 1          | 1          | 3          | 1.00       | 1.00                 |
| 41 | 3          | 2          | 2          | 2          | 3          | 1.00       | 0.99                 |
| 76 | 3          | 2          | 1          | 3          | 3          | 1.00       | 1.00                 |
| 77 | 3          | 2          | 1          | 2          | 3          | 1.00       | 1.00                 |
| 78 | 3          | 2          | 1          | 1          | 3          | 1.00       | 1.00                 |
| 79 | 3          | 1          | 1          | 3          | 3          | 1.00       | 1.00                 |
| 80 | 3          | 1          | 1          | 2          | 3          | 1.00       | 1.00                 |
| 81 | 3          | 1          | 1          | 1          | 3          | 1.00       | 1.00                 |
| 83 | 1          | 3          | 1          | 2          | 3          | 1.00       | 0.90                 |
| 84 | 1          | 3          | 1          | 1          | 3          | 1.00       | 0.93                 |

Table S2. **Adhesion Scenarios Prone to Early Type 1 CNV ( $MW > 0.9$ ) if CNV Initiates.** A large  $MW$  indicates that almost no **stalk cells** cross the **RPE** and come into contact with the **POS**. **Early Type 1 CNV** occurs primarily for two main classes of adhesion scenarios: 1) When **RPE-BrM labile adhesion** is moderately to severely impaired ( $RBl + RBp \leq 4$ ), but **RPE-RPE** and **RPE-POS labile adhesion** are both normal ( $RRl = 3$  and  $ROl = 3$ ). 2) When both **RPE-RPE** and **RPE-BrM labile adhesion** are severely impaired ( $RRl = 1$  and  $RBl = 1$ ), **RPE-BrM plastic coupling** strength is moderately to severely impaired ( $RBp \leq 2$ ) and both **RPE-RPE plastic coupling** adhesion and **RPE-POS labile adhesion** are normal ( $RRp = 3$ ,  $ROl = 3$ ) (ID: 83 and 84). The CNV initiation probability ranges from 0.3 to 1. Key: ID: adhesion scenario ID.  $RRl$ : **RPE-RPE labile adhesion** strength,  $RRp$ : **RPE-RPE plastic coupling** strength,  $RBl$ : **RPE-BrM labile adhesion** strength,  $RBp$ : **RPE-BrM plastic coupling** strength,  $ROl$ : **RPE-POS labile adhesion** strength.  $P_{init}$ : CNV initiation probability.  $\langle MW \rangle$ : mean morphometric weight. Both  $\langle MW \rangle$  and  $P_{init}$  are calculated from 10 simulation replicas for each adhesion scenario. Scaled adhesion strengths: 3: normal (green), 2: moderately impaired (yellow), 1: severely impaired (weak) (red). Adhesion scenarios sequentially sorted largest to smallest in order by  $RRl$ , then by  $RRp$ , then by  $RBl$ , then by  $RBp$  and then by  $ROl$ .
