# Supplementary material for: گزارش یک مورد سیالادنیت اسکلروزه مزمن درغدد بزاقی فرعی
Source: PLOS journal article supplement (doi:10.1371/journal.pcbi.1002440), 2012-08-10
Supplement: S3 (10.1371/journal.pcbi.1002440.s003) [file journal.pcbi.1002440.s003]

| ID  | RRl | RRp | RBl | RBp | ROl | $P_{init}$ | <MW> |
|-----|-----|-----|-----|-----|-----|------------|------|
| 19  | 3   | 3   | 3   | 3   | 1   | 0.50       | 0.04 |
| 20  | 3   | 3   | 3   | 2   | 1   | 0.80       | 0.01 |
| 21  | 3   | 3   | 3   | 1   | 1   | 0.90       | 0.01 |
| 55  | 3   | 3   | 2   | 3   | 1   | 0.50       | 0.03 |
| 22  | 3   | 2   | 3   | 3   | 1   | 0.80       | 0.02 |
| 23  | 3   | 2   | 3   | 2   | 1   | 1.00       | 0.01 |
| 24  | 3   | 2   | 3   | 1   | 1   | 1.00       | 0.02 |
| 58  | 3   | 2   | 2   | 3   | 1   | 0.90       | 0.02 |
| 60  | 3   | 2   | 2   | 1   | 1   | 1.00       | 0.04 |
| 25  | 3   | 1   | 3   | 3   | 1   | 0.90       | 0.01 |
| 26  | 3   | 1   | 3   | 2   | 1   | 0.90       | 0.02 |
| 27  | 3   | 1   | 3   | 1   | 1   | 1.00       | 0.01 |
| 61  | 3   | 1   | 2   | 3   | 1   | 1.00       | 0.01 |
| 62  | 3   | 1   | 2   | 2   | 1   | 1.00       | 0.03 |
| 10  | 1   | 3   | 3   | 3   | 3   | 1.00       | 0.02 |
| 28  | 1   | 3   | 3   | 3   | 1   | 1.00       | 0.00 |
| 11  | 1   | 3   | 3   | 2   | 3   | 1.00       | 0.03 |
| 29  | 1   | 3   | 3   | 2   | 1   | 1.00       | 0.01 |
| 12  | 1   | 3   | 3   | 1   | 3   | 1.00       | 0.03 |
| 30  | 1   | 3   | 3   | 1   | 1   | 1.00       | 0.01 |
| 64  | 1   | 3   | 2   | 3   | 1   | 1.00       | 0.01 |
| 65  | 1   | 3   | 2   | 2   | 1   | 1.00       | 0.01 |
| 66  | 1   | 3   | 2   | 1   | 1   | 1.00       | 0.01 |
| 100 | 1   | 3   | 1   | 3   | 1   | 1.00       | 0.02 |
| 101 | 1   | 3   | 1   | 2   | 1   | 1.00       | 0.05 |
| 13  | 1   | 2   | 3   | 3   | 3   | 1.00       | 0.03 |
| 31  | 1   | 2   | 3   | 3   | 1   | 1.00       | 0.02 |
| 14  | 1   | 2   | 3   | 2   | 3   | 1.00       | 0.03 |
| 32  | 1   | 2   | 3   | 2   | 1   | 1.00       | 0.03 |
| 15  | 1   | 2   | 3   | 1   | 3   | 1.00       | 0.05 |
| 33  | 1   | 2   | 3   | 1   | 1   | 1.00       | 0.03 |
| 67  | 1   | 2   | 2   | 3   | 1   | 1.00       | 0.03 |
| 68  | 1   | 2   | 2   | 2   | 1   | 1.00       | 0.04 |
| 69  | 1   | 2   | 2   | 1   | 1   | 1.00       | 0.04 |
| 103 | 1   | 2   | 1   | 3   | 1   | 1.00       | 0.04 |
| 16  | 1   | 1   | 3   | 3   | 3   | 1.00       | 0.03 |
| 34  | 1   | 1   | 3   | 3   | 1   | 1.00       | 0.02 |
| 17  | 1   | 1   | 3   | 2   | 3   | 1.00       | 0.03 |
| 35  | 1   | 1   | 3   | 2   | 1   | 1.00       | 0.03 |
| 36  | 1   | 1   | 3   | 1   | 1   | 1.00       | 0.03 |
| 70  | 1   | 1   | 2   | 3   | 1   | 1.00       | 0.03 |
| 72  | 1   | 1   | 2   | 1   | 1   | 1.00       | 0.05 |

|     |   |   |   |   |   |      |      |
|-----|---|---|---|---|---|------|------|
| 106 | 1 | 1 | 1 | 3 | 1 | 1.00 | 0.05 |
|-----|---|---|---|---|---|------|------|

Table S3. **Adhesion Scenarios Prone to Early Type 2 CNV ( $MW < 0.05$ ) if CNV Initiates.** A small  $MW$  indicates that most **stalk cells** cross the **RPE** and come into contact with the **POS**. **ET2 CNV** occurs primarily for three main classes of adhesion scenarios: 1) When **RPE-RPE labile adhesion** is normal ( $RRI = 3$ ), **RPE-BrM labile adhesion** is normal or moderately impaired ( $RBI \geq 2$ ), and **RPE-POS labile adhesion** is severely impaired ( $ROI = 1$ ). 2) When **RPE-RPE labile adhesion** is severely impaired ( $RRI = 1$ ) and **RPE-BrM labile adhesion** is either normal or moderately impaired ( $RBI \geq 2$ ). 3) When **RPE-RPE**, **RPE-BrM** and **RPE-POS labile adhesion** are severely impaired ( $RRI = RBI = ROI = 1$ ), and the combination of **RPE-RPE** and **RPE-BrM plastic coupling** satisfies  $RBp + RRp > 3$ . Unless all **labile adhesions** are severely impaired, impairment of either **RPE-RPE** or **RPE-BrM plastic coupling** has little effect on the average  $MW$ , though it does increase the **CNV** initiation probability. For example, adhesion scenarios ID: 22 and 24, which differ only in their **RPE-BrM plastic coupling**, exhibit the same mean  $MW$ ; however,  $P_{init} = 0.8$  for normal **RPE-BrM plastic coupling** (ID: 22) and  $P_{init} = 1$  for severely impaired **RPE-BrM plastic coupling** (ID: 24). The **CNV** initiation probability ranges from 0.5 to 1. Key: ID: adhesion scenario ID.  $RRI$ : **RPE-RPE labile adhesion** strength,  $RRp$ : **RPE-RPE plastic coupling** strength,  $RBI$ : **RPE-BrM labile adhesion** strength,  $RBp$ : **RPE-BrM plastic coupling** strength,  $ROI$ : **RPE-POS labile adhesion** strength.  $P_{init}$ : **CNV** initiation probability.  $\langle MW \rangle$ : mean morphometric weight. Both  $\langle MW \rangle$  and  $P_{init}$  calculated from 10 simulation replicas for each adhesion scenario. Scaled adhesion strengths: 3: normal (green), 2: moderately impaired (yellow), 1: severely impaired (weak) (red). Adhesion scenarios sequentially sorted largest to smallest in order by  $RRI$ , then by  $RRp$ , then by  $RBI$ , then by  $RBp$  and then by  $ROI$ .
