# Supplementary material for: گزارش یک مورد سیالادنیت اسکلروزه مزمن درغدد بزاقی فرعی
Source: PLOS journal article supplement (doi:10.1371/journal.pcbi.1002440), 2012-08-10
Supplement: S7 (10.1371/journal.pcbi.1002440.s007) [file journal.pcbi.1002440.s007]

| ID | <i>RRl</i> | <i>RRp</i> | <i>RBl</i> | <i>RBp</i> | <i>ROl</i> | $P_{\text{init}}$ | <b>P13</b><br>Probability |
|----|------------|------------|------------|------------|------------|-------------------|---------------------------|
| 83 | 1          | 3          | 1          | 2          | 3          | 1.00              | 1.00                      |
| 86 | 1          | 2          | 1          | 2          | 3          | 1.00              | 1.00                      |
| 90 | 1          | 1          | 1          | 1          | 3          | 1.00              | 1.00                      |
| 89 | 1          | 1          | 1          | 2          | 3          | 1.00              | 1.00                      |

Table S7. **Selected Adhesion Scenarios Prone to Sub-RPE to Sub-Retinal Progression (P13 Progression) (P13 Probability > 0.7).** P13 progression primarily occurs when both RPE-RPE and RPE-BrM labile adhesion are severely impaired ( $RRl = 1$  and  $RBl = 1$ ), RPE-BrM plastic coupling is moderately to severely impaired ( $RBp \leq 2$ ), and RPE-POS labile adhesion is normal ( $ROl = 3$ ). Key: ID: adhesion scenario ID. *RRl*: RPE-RPE labile adhesion strength, *RRp*: RPE-RPE plastic coupling strength, *RBl*: RPE-BrM labile adhesion strength, *RBp*: RPE-BrM plastic coupling strength, *ROl*: RPE-POS labile adhesion strength.  $P_{\text{init}}$ : CNV initiation probability. P13 probability: P13 CNV probability of occurrence. Both P13 probability and  $P_{\text{init}}$  are calculated from 10 simulation replicas for each adhesion scenario. Scaled adhesion strengths: 3: normal (green), 2: moderately impaired (yellow), 1: severely impaired (weak) (red). Adhesion scenarios sequentially sorted largest to smallest in order by *RRl*, then by *RRp*, then by *RBl*, then by *RBp* and then by *ROl*.
