# Supplementary material for: گزارش یک مورد سیالادنیت اسکلروزه مزمن درغدد بزاقی فرعی
Source: PLOS journal article supplement (doi:10.1371/journal.pcbi.1002440), 2012-08-10
Supplement: S8 (10.1371/journal.pcbi.1002440.s008) [file journal.pcbi.1002440.s008]

| ID  | <i>RRI</i> | <i>RRp</i> | <i>RBI</i> | <i>RBp</i> | <i>ROI</i> | $P_{init}$ | <b>S22</b><br>Probability |
|-----|------------|------------|------------|------------|------------|------------|---------------------------|
| 21  | 3          | 3          | 3          | 1          | 1          | 0.90       | 0.90                      |
| 23  | 3          | 2          | 3          | 2          | 1          | 1.00       | 1.00                      |
| 24  | 3          | 2          | 3          | 1          | 1          | 1.00       | 1.00                      |
| 58  | 3          | 2          | 2          | 3          | 1          | 0.90       | 0.90                      |
| 60  | 3          | 2          | 2          | 1          | 1          | 1.00       | 1.00                      |
| 25  | 3          | 1          | 3          | 3          | 1          | 0.90       | 0.90                      |
| 26  | 3          | 1          | 3          | 2          | 1          | 0.90       | 0.90                      |
| 27  | 3          | 1          | 3          | 1          | 1          | 1.00       | 1.00                      |
| 61  | 3          | 1          | 2          | 3          | 1          | 1.00       | 1.00                      |
| 62  | 3          | 1          | 2          | 2          | 1          | 1.00       | 1.00                      |
| 63  | 3          | 1          | 2          | 1          | 1          | 1.00       | 1.00                      |
| 10  | 1          | 3          | 3          | 3          | 3          | 1.00       | 1.00                      |
| 28  | 1          | 3          | 3          | 3          | 1          | 1.00       | 1.00                      |
| 11  | 1          | 3          | 3          | 2          | 3          | 1.00       | 1.00                      |
| 29  | 1          | 3          | 3          | 2          | 1          | 1.00       | 1.00                      |
| 12  | 1          | 3          | 3          | 1          | 3          | 1.00       | 1.00                      |
| 30  | 1          | 3          | 3          | 1          | 1          | 1.00       | 1.00                      |
| 46  | 1          | 3          | 2          | 3          | 3          | 1.00       | 1.00                      |
| 64  | 1          | 3          | 2          | 3          | 1          | 1.00       | 1.00                      |
| 65  | 1          | 3          | 2          | 2          | 1          | 1.00       | 1.00                      |
| 66  | 1          | 3          | 2          | 1          | 1          | 1.00       | 1.00                      |
| 100 | 1          | 3          | 1          | 3          | 1          | 1.00       | 1.00                      |
| 101 | 1          | 3          | 1          | 2          | 1          | 1.00       | 1.00                      |
| 102 | 1          | 3          | 1          | 1          | 1          | 1.00       | 1.00                      |
| 13  | 1          | 2          | 3          | 3          | 3          | 1.00       | 1.00                      |
| 31  | 1          | 2          | 3          | 3          | 1          | 1.00       | 1.00                      |
| 14  | 1          | 2          | 3          | 2          | 3          | 1.00       | 1.00                      |
| 32  | 1          | 2          | 3          | 2          | 1          | 1.00       | 1.00                      |
| 15  | 1          | 2          | 3          | 1          | 3          | 1.00       | 1.00                      |
| 49  | 1          | 2          | 2          | 3          | 3          | 1.00       | 1.00                      |
| 67  | 1          | 2          | 2          | 3          | 1          | 1.00       | 1.00                      |
| 68  | 1          | 2          | 2          | 2          | 1          | 1.00       | 1.00                      |
| 103 | 1          | 2          | 1          | 3          | 1          | 1.00       | 1.00                      |
| 104 | 1          | 2          | 1          | 2          | 1          | 1.00       | 0.90                      |
| 16  | 1          | 1          | 3          | 3          | 3          | 1.00       | 1.00                      |
| 34  | 1          | 1          | 3          | 3          | 1          | 1.00       | 1.00                      |
| 17  | 1          | 1          | 3          | 2          | 3          | 1.00       | 1.00                      |
| 35  | 1          | 1          | 3          | 2          | 1          | 1.00       | 1.00                      |
| 52  | 1          | 1          | 2          | 3          | 3          | 1.00       | 1.00                      |
| 70  | 1          | 1          | 2          | 3          | 1          | 1.00       | 1.00                      |
| 71  | 1          | 1          | 2          | 2          | 1          | 1.00       | 0.90                      |
| 106 | 1          | 1          | 1          | 3          | 1          | 1.00       | 1.00                      |

Table S8. **Adhesion Scenarios Prone to Stable Type 2 CNV (S22) (S22 Probability > 0.9).** The three main classes of adhesion scenario that cause **ET2 CNV** also predominantly lead to **S22 CNV**: 1) When **RPE-RPE labile adhesion** is normal ( $RRl = 3$ ), **RPE-BrM labile adhesion** is normal or moderately impaired ( $RBl \geq 2$ ), and **RPE-POS labile adhesion** is severely impaired ( $ROl = 1$ ). 2) When **RPE-RPE labile adhesion** is weak ( $RRl = 1$ ), **RPE-BrM labile adhesion** is normal or moderately impaired ( $RBl \geq 2$ ). 3) When **RPE-RPE**, **RPE-BrM** and **RPE-POS labile adhesion** are severely impaired ( $RRl = RBl = ROl = 1$ ), and the combination of **RPE-RPE** and **RPE-BrM plastic coupling** strengths satisfies  $RBp + RRp > 3$ . Key: ID: adhesion scenario ID.  $RRl$ : **RPE-RPE labile adhesion** strength,  $RRp$ : **RPE-RPE plastic coupling** strength,  $RBl$ : **RPE-BrM labile adhesion** strength,  $RBp$ : **RPE-BrM plastic coupling** strength,  $ROl$ : **RPE-POS labile adhesion** strength.  $P_{init}$ : CNV initiation probability. Both the **S22 CNV** probability and  $P_{init}$  are calculated from 10 simulation replicas for each adhesion scenario. Scaled adhesion strengths: 3: normal (green), 2: moderately impaired (yellow), 1: severely impaired (weak) (red). Adhesion scenarios sequentially sorted largest to smallest in order by  $RRl$ , then by  $RRp$ , then by  $RBl$ , then by  $RBp$  and then by  $ROl$ .
