# Supplementary material for: گزارش یک مورد سیالادنیت اسکلروزه مزمن درغدد بزاقی فرعی
Source: PLOS journal article supplement (doi:10.1371/journal.pcbi.1002440), 2012-08-10
Supplement: S9 (10.1371/journal.pcbi.1002440.s009) [file journal.pcbi.1002440.s009]

| ID  | <i>RRl</i> | <i>RRp</i> | <i>RBl</i> | <i>RBp</i> | <i>ROl</i> | $P_{init}$ | <b>P23</b><br>Probability |
|-----|------------|------------|------------|------------|------------|------------|---------------------------|
| 105 | 1          | 2          | 1          | 1          | 1          | 1.00       | 0.60                      |
| 108 | 1          | 1          | 1          | 1          | 1          | 1.00       | 1.00                      |

Table S9. **Adhesion Scenarios Prone to Sub-Retinal CNV to Sub-RPE CNV Progression (P23 CNV) (P23 Probability > 0.6).** P23 CNV primarily occurs when **RPE-RPE plastic coupling** is severely or moderately impaired ( $RRp \leq 2$ ) and all other adhesions are severely impaired ( $RRl = 1$ ,  $RBl = 1$ ,  $RBp = 1$ ,  $ROl = 1$ ). Key: ID: adhesion scenario ID. *RRl*: **RPE-RPE labile adhesion** strength, *RRp*: **RPE-RPE plastic coupling** strength, *RBl*: **RPE-BrM labile adhesion** strength, *RBp*: **RPE-BrM plastic coupling** strength, *ROl*: **RPE-POS labile adhesion** strength.  $P_{init}$ : **CNV initiation probability**. Both **P23 CNV** probability and  $P_{init}$  are calculated from 10 simulation replicas for each adhesion scenario. Scaled adhesion strengths: 3: normal (green), 2: moderately impaired (yellow), 1: severely impaired (weak) (red).
