# Supplementary material for: گزارش یک مورد سیالادنیت اسکلروزه مزمن درغدد بزاقی فرعی
Source: PLOS journal article supplement (doi:10.1371/journal.pcbi.1002440), 2012-08-10
Supplement: S10 (10.1371/journal.pcbi.1002440.s010) [file journal.pcbi.1002440.s010]

| ID | <i>RRl</i> | <i>RRp</i> | <i>RBl</i> | <i>RBp</i> | <i>ROl</i> | Initiation Probability | <b>S33</b> Probability |
|----|------------|------------|------------|------------|------------|------------------------|------------------------|
| 88 | 1          | 1          | 1          | 3          | 3          | 1.00                   | 1.00                   |
| 54 | 1          | 1          | 2          | 1          | 3          | 1.00                   | 1.00                   |
| 53 | 1          | 1          | 2          | 2          | 3          | 1.00                   | 1.00                   |
| 85 | 1          | 2          | 1          | 3          | 3          | 1.00                   | 1.00                   |
| 51 | 1          | 2          | 2          | 1          | 3          | 1.00                   | 1.00                   |
| 50 | 1          | 2          | 2          | 2          | 3          | 1.00                   | 1.00                   |
| 82 | 1          | 3          | 1          | 3          | 3          | 1.00                   | 1.00                   |
| 48 | 1          | 3          | 2          | 1          | 3          | 1.00                   | 1.00                   |
| 47 | 1          | 3          | 2          | 2          | 3          | 1.00                   | 1.00                   |

Table S10. Adhesion Scenarios Prone to Stable Type 3 CNV (S33 CNV) (S33 Probability > 0.9). S33 CNV occurs primarily for two classes of adhesion scenarios: 1) When **RPE-RPE labile adhesion** is severely impaired ( $RRl = 1$ ), **RPE-POS labile adhesion** is normal ( $ROl = 3$ ), **RPE-BrM labile adhesion** is moderately impaired ( $RBl = 2$ ) and **RPE-BrM plastic coupling** satisfies  $RBl + RBp \leq 4$ . 2) When **RPE-RPE labile adhesion** is severely impaired ( $RRl = 1$ ), **RPE-POS labile adhesion** is normal ( $ROl = 3$ ), **RPE-BrM labile adhesion** is severely impaired ( $RBl = 1$ ) and **RPE-BrM plastic coupling** is normal ( $RBp = 3$ ). **RPE-RPE plastic coupling** has no effect on the probability of CNV initiation or occurrence of S33 CNV in these scenarios. Key: ID: adhesion scenario ID. *RRl*: **RPE-RPE labile adhesion** strength, *RRp*: **RPE-RPE plastic coupling** strength, *RBl*: **RPE-BrM labile adhesion** strength, *RBp*: **RPE-BrM plastic coupling** strength, *ROl*: **RPE-POS labile adhesion** strength.  $P_{init}$ : CNV initiation probability. Both the P23 CNV probability and  $P_{init}$  are calculated from 10 simulation replicas for each adhesion scenario. Scaled adhesion strengths: 3: normal (green), 2: moderately impaired (yellow), 1: severely impaired (weak) (red). Adhesion scenarios sequentially sorted largest to smallest in order by *RRl*, then by *RRp*, then by *RBl*, then by *RBp* and then by *ROl*.
