# Supplementary material for: گزارش یک مورد سیالادنیت اسکلروزه مزمن درغدد بزاقی فرعی
Source: PLOS journal article supplement (doi:10.1371/journal.pcbi.1002440), 2012-08-10
Supplement: S14 (10.1371/journal.pcbi.1002440.s014) [file journal.pcbi.1002440.s014]

301 Moved Permanently

# Moved Permanently

The document has moved here.

---

Apache Server at www.ploscompbiol.org Port 80
