# Supplementary material for: Adhesion Failures Determine the Pattern of Choroidal Neovascularization in the Eye: A Computer Simulation Study
Source: PLoS Comput Biol. 2012 May 3;8(5):e1002440. doi: 10.1371/journal.pcbi.1002440 (PMC3342931; doi:10.1371/journal.pcbi.1002440)
Supplement: Table S5 — Adhesion Scenarios Prone to Stable Type 1 CNV (S11 CNV Probability>0.9). (PDF) [file pcbi.1002440.s005.pdf]

| ID | <i>RRl</i> | <i>RRp</i> | <i>RBl</i> | <i>RBp</i> | <i>ROl</i> | $P_{\text{init}}$ | <b>S11</b><br>Probability |
|----|------------|------------|------------|------------|------------|-------------------|---------------------------|
| 3  | 3          | 3          | 3          | 1          | 3          | 0.30              | 1.00                      |
| 41 | 3          | 2          | 2          | 2          | 3          | 1.00              | 1.00                      |
| 80 | 3          | 1          | 1          | 2          | 3          | 1.00              | 0.90                      |
| 79 | 3          | 1          | 1          | 3          | 3          | 1.00              | 0.90                      |
| 77 | 3          | 2          | 1          | 2          | 3          | 1.00              | 0.90                      |
| 76 | 3          | 2          | 1          | 3          | 3          | 1.00              | 0.90                      |
| 74 | 3          | 3          | 1          | 2          | 3          | 1.00              | 0.90                      |
| 73 | 3          | 3          | 1          | 3          | 3          | 1.00              | 0.90                      |
| 39 | 3          | 3          | 2          | 1          | 3          | 1.00              | 0.90                      |
| 38 | 3          | 3          | 2          | 2          | 3          | 0.90              | 0.90                      |

Table S5. **Adhesion Scenarios Prone to Stable Type 1 CNV (S11 CNV Probability > 0.9).** Adhesion scenarios that develop **Early Type 1 CNV (ET1 CNV,  $MW > 75\%$ )** in which CNV remains confined to the **sub-RPE** space (**Late Type 1 CNV,  $MW > 75\%$** ). **S11 CNV** occurs primarily when **RPE-BrM labile adhesion** is moderately to severely impaired, **RPE-BrM plastic coupling** satisfies  $3 \leq RBl + RBp \leq 4$ , and both **RPE-RPE** and **RPE-POS labile adhesion** are normal ( $RRl = 3$  and  $ROl = 3$ ). However, adhesion scenario ID: 3 belongs to a separate class. The CNV initiation probability ranges from 0.3 to 1. Key: ID: adhesion scenario ID. *RRl*: **RPE-RPE labile adhesion** strength, *RRp*: **RPE-RPE plastic coupling** strength, *RBl*: **RPE-BrM labile adhesion** strength, *RBp*: **RPE-BrM plastic coupling** strength, *ROl*: **RPE-POS labile adhesion** strength.  $P_{\text{init}}$ : CNV initiation probability. **S11** probability: Probability of occurrence **S11 CNV**. Both **S11** probability and  $P_{\text{init}}$  are calculated from 10 simulation replicas for each adhesion scenario. Scaled adhesion strengths: 3: normal (green), 2: moderately impaired (yellow), 1: severely impaired (weak) (red). Adhesion scenarios sequentially sorted largest to smallest in order by *RRl*, then by *RRp*, then by *RBl*, then by *RBp* and then by *ROl*.
