# Supplementary material for: Adhesion Failures Determine the Pattern of Choroidal Neovascularization in the Eye: A Computer Simulation Study
Source: PLoS Comput Biol. 2012 May 3;8(5):e1002440. doi: 10.1371/journal.pcbi.1002440 (PMC3342931; doi:10.1371/journal.pcbi.1002440)
Supplement: Table S6 — Adhesion Scenarios Prone to Sub-RPE to Sub-Retinal Translocation (T12 Translocation). (PDF) [file pcbi.1002440.s006.pdf]

| ID | <i>RRl</i> | <i>RRp</i> | <i>RBl</i> | <i>RBp</i> | <i>ROl</i> | $P_{\text{init}}$ | <b>T12</b><br>Probability |
|----|------------|------------|------------|------------|------------|-------------------|---------------------------|
| 91 | 3          | 3          | 1          | 3          | 1          | 0.90              | 0.50                      |
| 92 | 3          | 3          | 1          | 2          | 1          | 1.00              | 0.40                      |
| 93 | 3          | 3          | 1          | 1          | 1          | 1.00              | 0.70                      |
| 94 | 3          | 2          | 1          | 3          | 1          | 1.00              | 0.30                      |
| 97 | 3          | 1          | 1          | 3          | 1          | 1.00              | 0.30                      |

Table S6. **Adhesion Scenarios Prone to Sub-RPE to Sub-Retinal Translocation (T12 Translocation)**. **T12** translocation occurs primarily when **RPE-RPE labile adhesion** is normal ( $RRl = 3$ ), both **RPE-BrM** and **RPE-POS labile adhesion** are severely impaired ( $RBl = 1$  and  $ROl = 1$ ), and the combination of **RPE-BrM** and **RPE-POS plastic coupling** satisfies  $RRp + RBp \geq 4$ , except for the case of  $RRp = RBp = 2$ . Key: ID: adhesion scenario ID. *RRl*: **RPE-RPE labile adhesion** strength, *RRp*: **RPE-RPE plastic coupling** strength, *RBl*: **RPE-BrM labile adhesion** strength, *RBp*: **RPE-BrM plastic coupling** strength, *ROl*: **RPE-POS labile adhesion** strength.  $P_{\text{init}}$ : **CNV** initiation probability. **T12** probability: Probability of occurrence of **T12 CNV**. Both the **T12** probability and  $P_{\text{init}}$  are calculated from 10 simulation replicas for each adhesion scenario. Scaled adhesion strengths: 3: normal (green), 2: moderately impaired (yellow), 1: severely impaired (weak) (red). Adhesion scenarios sequentially sorted largest to smallest in order by *RRl*, then by *RRp*, then by *RBl*, then by *RBp* and then by *ROl*.
